# Supplementary material
Source: publisher figshare collection journal article supplement (https://geolsoc.figshare.com/ndownloader/files/22913627)
Supplement: Supplementary file 1 [file 22913627]

## Sheet: Sheet1
Sample No.	Th/U	Isotopic ratioes			Ages (Ma)
		206Pb/238U	207Pb/235U	207Pb/206Pb	206Pb/238U	207Pb/235U
PM008TW8-2.1	0.8584	0.05121	0.37549	0.05324	322	324
PM008TW8-2.2	0.75835	0.0513	0.40012	0.05657	323	342
PM008TW8-2.3	0.72778	0.0491	0.38089	0.05604	309	328
PM008TW8-2.4	0.51507	0.05355	0.39206	0.05311	336	336
PM008TW8-2.5	0.54394	0.05297	0.40925	0.05629	333	348
PM008TW8-2.6	0.66656	0.04008	0.36055	0.06574	253	313
PM008TW8-2.7	0.9978	0.06167	0.4538	0.05357	386	380
PM008TW8-2.8	0.81963	0.05182	0.35726	0.04994	326	310
PM008TW8-2.9	0.83526	0.06503	0.50732	0.05653	406	417
PM008TW8-2.10	0.46588	0.0553	0.42891	0.05606	347	362
PM008TW8-2.11	0.71101	0.04838	0.35194	0.0527	305	306
PM008TW8-2.12	0.44464	0.14905	1.46393	0.07124	896	916
PM008TW8-2.13	0.61086	0.05275	0.40636	0.05591	331	346
PM008TW8-2.14	0.1626	0.26632	3.44617	0.09384	1522	1515
PM008TW8-2.15	0.55178	0.04286	0.29084	0.04936	271	259
PM008TW8-2.16	0.50314	0.04686	0.34667	0.05371	295	302
PM008TW8-2.17	1.33188	0.17152	1.69478	0.07175	1020	1007
PM008TW8-2.18	0.77133	0.02213	0.12817	0.04211	141	122
PM008TW8-2.19	1.33322	0.5299	13.5183	0.1851	2741	2717
PM008TW8-2.20	0.82503	0.04623	0.32219	0.05067	291	284
PM008TW8-2.21	0.30434	0.08112	0.61894	0.05534	503	489
PM008TW8-2.22	0.94649	0.05029	0.59978	0.08561	316	477
PM008TW8-2.23	0.4674	0.04871	0.37814	0.05638	307	326
PM008TW8-2.24	0.591	0.32609	5.10598	0.11362	1819	1837
PM008TW8-2.25	1.44483	0.04755	0.33363	0.05089	299	292
PM008TW8-2.26	0.82682	0.0625	0.48523	0.05627	391	402
PM008TW8-2.27	1.51587	0.48805	11.2053	0.1666	2562	2540
PM008TW8-2.28	0.52599	0.07185	0.59363	0.05999	447	473
PM008TW8-2.29	0.98774	0.47102	10.7008	0.16491	2488	2497
PM008TW8-2.30	1.33114	0.05333	0.39498	0.05378	335	338
PM008TW8-2.31	0.19245	0.04449	0.31829	0.05187	281	281
PM008TW8-2.32	0.64791	0.05268	0.35897	0.04957	331	311
PM008TW8-2.33	0.88585	0.04465	0.32458	0.05278	282	285
D9042.1	1.24721	0.0750963	0.629564	0.0613028	466.787	495.824
D9042.2	0.907692	0.0428055	0.305318	0.0516737	270.199	270.545
D9042.3	0.341324	0.0430323	0.28596	0.0481813	271.601	255.374
D9042.4	0.84141	0.0762868	0.766548	0.0729481	473.921	577.78
D9042.5	0.698577	0.043091	0.327222	0.0551394	271.964	287.443
D9042.6	1.33565	0.0428874	0.318717	0.0538579	270.706	280.915
D9042.7	2.09465	0.0892641	1.02763	0.0845826	551.184	717.74
D9042.8	0.959053	0.0501427	0.350706	0.0507219	315.398	305.252
D9042.9	0.971288	0.0545846	0.37435	0.0497126	342.607	322.872
D9042.10	1.27093	0.0441994	0.341102	0.056042	278.81	298.006
D9042.11	1.57828	0.0442297	0.352589	0.0577797	278.998	306.666
D9042.12	1.27297	0.0697666	0.558716	0.0579697	434.75	450.69
D9042.13	1.02947	0.0436976	0.32314	0.0536863	275.712	284.315
D9042.14	0.707698	0.0780725	0.650392	0.0601885	484.607	508.72
D9042.15	0.903951	0.0731009	0.639537	0.0632711	454.811	502.02
D9042.16	1.24857	0.0442769	0.306087	0.0501764	279.289	271.143
D9042.17	1.48283	0.0445015	0.336895	0.0549042	280.675	294.816
D9042.18	1.12841	0.0428412	0.317614	0.0536716	270.42	280.065
D9042.19	1.26595	0.0429322	0.352537	0.0591529	270.983	306.628
D9042.20	0.610122	0.0428069	0.365579	0.0615637	270.208	316.371
D9042.21	0.929813	0.0430085	0.315298	0.0533942	271.454	278.279
D9042.22	0.321097	0.170681	2.25336	0.0950694	1015.86	1197.83
D9042.23	1.62959	0.312801	5.24646	0.121648	1754.48	1860.2
D9042.24	1.31969	0.0538031	0.411419	0.0554996	337.828	349.897
D9042.25	0.0732892	0.322545	5.01793	0.112817	1802.15	1822.35
D9042.26	1.09274	0.0471165	0.40777	0.0625031	296.794	347.268
D9042.27	1.11549	0.0442489	0.30615	0.0500904	279.116	271.193
D9042.28	1.32629	0.0431766	0.337536	0.056249	272.493	295.303
D9042.29	1.00719	0.0518482	0.354993	0.0497252	325.858	308.47
TW1041.1	0.81256	0.08306	0.65747	0.05747	514	513
TW1041.2	0.41002	0.07163	0.54377	0.05511	446	441
TW1041.3	1.2612	0.0702	0.53301	0.05511	437	434
TW1041.4	0.30523	0.04722	0.34464	0.05286	297	301
TW1041.5	0.45268	0.06697	0.48758	0.05287	418	403
TW1041.6	0.51554	0.04916	0.36465	0.0537	309	316
TW1041.7	0.4597	0.04629	0.33325	0.05227	292	292
TW1041.8	0.594	0.05153	0.49569	0.06893	324	409
TW1041.9	0.92406	0.06364	0.45993	0.05245	398	384
TW1041.10	0.70489	0.06751	0.47659	0.05144	421	396
TW1041.11	0.34082	0.04737	0.35788	0.0548	298	311
TW1041.12	0.53102	0.04167	0.28283	0.04928	263	253
TW1041.13	0.49007	0.04965	0.32644	0.04777	312	287
TW1041.14	0.6571	0.04068	0.2745	0.04899	257	246
TW1041.15	0.95482	0.07101	0.539	0.05513	442	438
TW1041.16	0.84489	0.07316	0.61314	0.06033	455	486
TW1041.17	0.94273	0.0476	0.34889	0.05327	300	304
TW1041.18	0.94048	0.0478	0.35929	0.05461	301	312
TW1041.19	0.52512	0.07082	0.51911	0.05337	441	425
TW1041.20	0.50936	0.04546	0.31316	0.05007	287	277
TW1041.21	1.193	0.04742	0.3261	0.05011	299	287
TW1041.22	0.58315	0.04719	0.3163	0.04848	297	279
TW1041.23	0.77334	0.06203	0.42173	0.04951	388	357
TW1041.24	0.94728	0.04858	0.31626	0.04726	306	279
TW1041.25	0.62827	0.05842	0.4378	0.05409	366	369
TW1041.26	0.45726	0.04885	0.29869	0.04436	307	265
TW1041.27	0.44805	0.40545	6.75917	0.12067	2194	2080
TW1041.28	0.25184	0.05047	0.33423	0.04816	317	293
TW1041.29	0.41551	0.06298	0.38155	0.04402	394	328
TW1041.30	0.37357	0.05058	0.35822	0.05132	318	311
TW1041.31	1.26073	0.07128	0.55091	0.05625	444	446
TW1041.32	0.57896	0.04966	0.34523	0.05033	312	301
TW1041.33	0.60323	0.04782	0.3529	0.05379	301	307
TW1041.34	0.65395	0.05206	0.4262	0.0596	327	360
TW1041.35	0.65118	0.04456	0.308	0.04967	281	273
TW1041.36	1.16737	0.04533	0.32819	0.05259	286	288
TW1041.37	0.60935	0.05315	0.34731	0.04729	334	303
TW1041.38	0.38731	0.0483	0.33598	0.0505	304	294
D9065.1	1.54205	0.04324	0.28916	0.04846	273	258
D9065.2	0.61527	0.04744	0.33384	0.05108	299	292
D9065.3	0.76987	0.04759	0.34451	0.05252	300	301
D9065.4	1.71331	0.5728	14.0941	0.17851	2919	2756
D9065.5	1.37057	0.51641	11.9024	0.16716	2684	2597
D9065.6	1.76737	0.50797	11.6756	0.16666	2648	2579
D9065.7	1.25827	0.0487	0.37119	0.05539	307	321
D9065.8	1.13165	0.04887	0.38763	0.058	308	333
D9065.9	1.26615	0.0485	0.33839	0.0506	305	296
D9065.10	0.92246	0.04171	0.31068	0.05401	263	275
D9065.11	0.8805	0.04088	0.30146	0.05365	258	268
D9065.14	1.29355	0.44592	10.0242	0.16303	2377	2437
D9065.15	1.38448	0.43199	9.6854	0.16259	2315	2405
D9065.16	0.59021	0.50068	11.5346	0.16709	2617	2567
D9065.18	0.4736	0.1504	1.4127	0.06797	903	894
D9065.19	0.41058	0.13665	1.2446	0.06604	826	821
D9065.20	1.47968	0.0456	0.32763	0.05203	287	288
D9065.21	1.05886	0.51669	12.7863	0.1794	2685	2664
D9065.22	0.86546	0.04107	0.33872	0.05989	259	296
D9065.23	0.63591	0.07139	0.54942	0.05587	445	445
D9065.24	0.68216	0.0468	0.33384	0.05169	295	292
D9065.25	1.05094	0.04645	0.34643	0.05421	293	302
D9065.26	1.30565	0.04874	0.36408	0.05418	307	315
D9027.1	0.857533	0.0767107	0.0582489	0.615884	476.46	487.264
D9027.2	1.7839	0.0408038	0.066568	0.372718	257.814	321.666
D9027.3	1.31847	0.438339	0.173724	10.4995	2343.2	2479.87
D9027.4	1.35901	0.03028	0.0956119	0.383631	192.3	329.706
D9027.5	1.14528	0.0405931	0.0563616	0.317166	256.509	279.72
D9027.6	1.18443	0.0560986	0.0781955	0.613243	351.855	485.604
D9027.7	0.437886	0.0721302	0.0726936	0.725127	448.977	553.689
D9027.8	0.665101	0.0414411	0.0521118	0.297473	261.759	264.425
D9027.9	0.839937	0.0610352	0.0565407	0.476303	381.918	395.533
D9027.10	0.941335	0.0399085	0.0469639	0.259338	252.266	234.133
D9027.11	0.850881	0.0399241	0.0519809	0.285765	252.362	255.221
D9027.12	1.49987	0.0404037	0.0506902	0.281712	255.335	252.015
D9027.13	2.5999	0.0568213	0.105372	0.981686	356.265	694.469
D9027.14	1.12192	0.0409389	0.047591	0.267359	258.65	240.58
D9027.15	1.10207	0.0401981	0.0500429	0.278878	254.061	249.767
D9027.16	0.908967	0.425043	0.165721	9.73169	2283.33	2409.71
D9027.17	1.24606	0.0542763	0.0510679	0.382936	340.722	329.196
D9027.18	1.26033	0.0395769	0.055313	0.301767	250.21	267.78
D9027.19	0.620631	0.0406263	0.05321	0.298566	256.714	265.28
D9027.20	1.63809	0.0411794	0.0521567	0.295639	260.139	262.988
D9027.21	1.20688	0.0655001	0.0610835	0.551734	408.988	446.132
D9027.22	0.923376	0.0402636	0.0494558	0.274808	254.467	246.53
D9027.23	0.906328	0.0397694	0.0530247	0.291461	251.403	259.709
D9027.24	0.81418	0.0398972	0.0548616	0.301792	252.196	267.799
TW4877-1-1	0.612628	0.044329	0.319831	0.0523146	279.611	281.772
TW4877-1-2	0.341578	0.045076	0.325041	0.052271	284.222	285.773
TW4877-1-3	0.398067	0.045432	0.333343	0.0531938	286.416	292.115
TW4877-1-4	0.330234	0.043492	0.325276	0.0541727	274.44	285.953
TW4877-1-5	0.515249	0.041309	0.297185	0.0521297	260.94	264.199
TW4877-1-6	0.578015	0.04559	0.334736	0.0532747	287.389	293.175
TW1038-1	0.468	0.0421	0.3018	0.052	266	268
TW1038-2	0.52	0.0426	0.3282	0.0559	269	288
TW1038-3	0.576	0.0205	0.1411	0.0499	131	134
TW1038-4	0.469	0.0584	2.4895	0.3094	366	1269
TW1038-5	0.314	0.104	8.5424	0.5956	638	2290
TW1038-6	0.755	0.1147	2.0272	0.1282	700	1125
TW1038-7	0.777	0.0227	0.2769	0.0884	145	248
TW1038-8	0.54	0.0415	0.3003	0.0524	262	267
TW1038-9	0.359	0.0418	0.2971	0.0515	264	264
TW1038-10	0.284	0.042	0.3037	0.0524	265	269
TW1038-11	0.434	0.0419	0.3028	0.0524	265	269
TW1038-12	0.03	0.2318	22.75	0.712	1344	3216
TW1038-13	0.375	0.0421	0.2861	0.0493	266	256
TW1038-14	0.427	0.0412	0.3031	0.0533	261	269
TW1038-15	0.526	0.0428	0.3088	0.0523	270	273
TW1038-16	0.64	0.0425	0.2967	0.0507	268	264
TW1038-17	0.603	0.0288	0.3787	0.0954	183	326
TW1038-18	1.079	0.0424	0.3009	0.0514	268	267
TW1038-19	2.523	0.0231	0.3524	0.1104	147	307
TW1038-20	0.742	3.0495	236.24	0.5619	9016	5553
TW1038-21	1.38	62.604	6977.2	0.8083	2677	8987
TW1038-22	0.486	0.0418	0.3076	0.0534	264	272
TW1038-23	0.505	0.0426	0.3126	0.0532	269	276
TW1038-24	0.449	0.0425	0.3024	0.0516	268	268
TW1038-25	0.034	0.3501	25.607	0.5305	1935	3332
TW1038-26	0.718	0.0426	0.3353	0.0571	269	294
